# Supplementary material
Source: PubMed Central journal article supplement (PMC4217085)
Supplement: NIHMS608626-supplement-SD_1.pdf [file NIHMS608626-supplement-SD_1.pdf]

## Confirmed TB disease

≥1 sign/ symptom suggestive of TB disease\*

AND

- Microbiological confirmation (Mtb Culture)

## Probable TB disease

≥1 sign/ symptom suggestive of TB disease\*

AND

- Positive CXR

AND

*1 of the following:*

- Positive contact
- Positive TST
- Clinical response to anti-TB treatment

## Possible TB disease

≥1 sign/ symptom suggestive of TB disease\*

AND

EITHER:

- Negative CXR

*with 1 of the following:*

- Positive contact
- Positive TST
- Clinical response to anti-TB treatment

OR

- Positive CXR, but
- No contact and negative TST

## Unlikely TB disease

Symptomatic, not fitting the other definitions and no alternative diagnosis established

**Supplement 1. NIH Consensus Clinical Case Definitions.** Based on Graham et al. *J Infect Dis.* May 15 2012;205 Suppl 2:S199-208. TB = tuberculosis, MTb = Mycobacterium tuberculosis, TST = tuberculin skin test, CXR = chest radiograph

\* Cough >2 weeks (not responding to antibiotics), fever >1 week, lethargy/decreased playfulness, weight loss
