# Supplementary material
Source: PubMed Central journal article supplement (PMC4217085)
Supplement: NIHMS608626-supplement-SD_2.pdf [file NIHMS608626-supplement-SD_2.pdf]

**Supplement 2. Characteristics, tuberculosis screening results, and outcomes of 300 severely malnourished hospitalized Malawian children evaluated for pulmonary tuberculosis by Xpert/culture and NIH clinical case definitions**

|                                                               | Total<br>N = 300 (%) |              | NIH clinical case definitions |             |                           |              |                            |              |                           |              |
|---------------------------------------------------------------|----------------------|--------------|-------------------------------|-------------|---------------------------|--------------|----------------------------|--------------|---------------------------|--------------|
|                                                               |                      |              | Confirmed TB<br>N = 2 (%)     |             | Probable TB<br>N = 20 (%) |              | Possible TB<br>N = 197 (%) |              | Unlikely TB<br>N = 81 (%) |              |
| <b>Baseline Demographics</b>                                  |                      |              |                               |             |                           |              |                            |              |                           |              |
| <u>Gender</u>                                                 |                      |              |                               |             |                           |              |                            |              |                           |              |
| Male                                                          | 146                  | (48.7)       | 1                             | (50.0)      | 12                        | (60.0)       | 99                         | (50.3)       | 34                        | (42.0)       |
| Female                                                        | 154                  | (51.3)       | 1                             | (50.0)      | 8                         | (40.0)       | 98                         | (49.7)       | 47                        | (58.0)       |
| <u>Age in months, median (IQR)</u>                            | 18.5                 | (12.1-25.6)  | 15.5                          | (11.2-19.9) | 15.6                      | (11.0-24.9)  | 18.0                       | (12.2-24.2)  | 20.2                      | (13.5-28.2)  |
| <u>HIV status<sup>1</sup></u>                                 |                      |              |                               |             |                           |              |                            |              |                           |              |
| Infected <sup>2</sup>                                         | 52/295               | (17.6)       | 0                             | (0.0)       | 5                         | (25.0)       | 39/192                     | (20.3)       | 8                         | (9.9)        |
| Exposed <sup>3</sup>                                          | 35/295               | (11.9)       | 1                             | (50.0)      | 5                         | (25.0)       | 25/192                     | (13.0)       | 4                         | (4.9)        |
| Unexposed                                                     | 208/295              | (70.5)       | 1                             | (50.0)      | 10                        | (50.0)       | 128/192                    | (66.7)       | 69                        | (85.2)       |
| <u>Severe malnutrition criteria</u>                           |                      |              |                               |             |                           |              |                            |              |                           |              |
| WFH z-score $\leq$ -3SD <sup>4</sup>                          | 61/127               | (48.0)       | 1/1                           | (100.0)     | 7/13                      | (53.8)       | 42/84                      | (50.0)       | 12/29                     | (41.4)       |
| WFH z-score, median (IQR)                                     | -2.9                 | (-3.8, -2.2) | -2.2                          | N/A         | -3.2                      | (-3.7, -2.8) | -3.0                       | (-3.7, -2.3) | -2.6                      | (-3.9, -1.8) |
| MUAC $\leq$ 115 mm                                            | 193                  | (64.3)       | 2                             | (100.0)     | 14                        | (70.0)       | 131                        | (66.5)       | 46                        | (56.8)       |
| Edema                                                         | 173                  | (57.7)       | 1                             | (50.0)      | 7                         | (35.0)       | 113                        | (57.4)       | 52                        | (64.2)       |
| <b>TB Screening</b>                                           |                      |              |                               |             |                           |              |                            |              |                           |              |
| <u>Clinical signs/symptoms suggestive of TB</u>               |                      |              |                               |             |                           |              |                            |              |                           |              |
| Severe malnutrition <sup>5</sup>                              | 300                  | (100.0)      | 2                             | (100.0)     | 20                        | (100.0)      | 197                        | (100.0)      | 81                        | (100.0)      |
| Cough $\geq$ 2 weeks <sup>6</sup>                             | 36                   | (12.0)       | 2                             | (100.0)     | 5                         | (25.0)       | 26                         | (13.2)       | 3                         | (3.7)        |
| Lethargy/<br>Reduced playfulness <sup>1</sup>                 | 269/299              | (90.0)       | 2                             | (100.0)     | 17                        | (85.0)       | 177/196                    | (90.3)       | 73                        | (90.1)       |
| Fever > 1 week                                                | 78                   | (26.0)       | 2                             | (100.0)     | 7                         | (35.0)       | 51                         | (25.9)       | 18                        | (22.2)       |
| <u>TB exposure</u>                                            |                      |              |                               |             |                           |              |                            |              |                           |              |
| Contact <sup>1</sup>                                          | 48/297               | (16.2)       | 1                             | (50.0)      | 8                         | (40.0)       | 37/195                     | (19.0)       | 2/80                      | (2.5)        |
| TST $\geq$ 5 mm <sup>1</sup>                                  | 40/287               | (13.9)       | 1                             | (50.0)      | 10/19                     | (52.6)       | 29/189                     | (15.3)       | 0/77                      | (0.0)        |
| <u>CXR consistent with TB<sup>1</sup></u>                     | 48/299               | (16.1)       | 2                             | (100.0)     | 20                        | (100.0)      | 26/196                     | (13.3)       | 0                         | (0.0)        |
| <b>Outcomes</b>                                               |                      |              |                               |             |                           |              |                            |              |                           |              |
| <u>Microbiologic confirmation</u>                             |                      |              |                               |             |                           |              |                            |              |                           |              |
| Smear positive                                                | 1                    | (0.3)        | 1                             | (50.0)      | 0                         | (0.0)        | 0                          | (0.0)        | 0                         | (0.0)        |
| Culture positive                                              | 2                    | (0.7)        | 2                             | (100.0)     | 0                         | (0.0)        | 0                          | (0.0)        | 0                         | (0.0)        |
| Xpert positive                                                | 3                    | (1.0)        | 2                             | (100.0)     | 0                         | (0.0)        | 1                          | (0.5)        | 0                         | (0.0)        |
| <u>Prescribed anti-TB therapy</u>                             | 132                  | (44.0)       | 2                             | (100.0)     | 16                        | (80.0)       | 97                         | (49.2)       | 17                        | (21.0)       |
| <u>Returned for follow-up</u>                                 | 134/271              | (49.4)       | 0                             | (0.0)       | 14/19                     | (73.7)       | 85/176                     | (48.3)       | 35/74                     | (47.3)       |
| <u>Response to anti-TB therapy at follow-up<sup>7,8</sup></u> | 44/58                | (75.9)       | 0                             | (0.0)       | 11/13                     | (84.6)       | 33/44                      | (75.0)       | 0/0                       | (0.0)        |
| <u>Death<sup>9</sup></u>                                      | 29                   | (9.7)        | 0                             | (0.0)       | 1                         | (5.0)        | 21                         | (10.7)       | 7                         | (8.6)        |

Abbreviations: NIH= National Institutes of Health, TB=tuberculosis, IQR=interquartile range, WFH= weight-for-height, SD= standard deviations, MUAC=mid-upper arm circumference, mm = millimeters, TST=tuberculin skin test, CXR=chest radiograph.

<sup>1</sup> N <300 due to missing data.

<sup>2</sup> HIV infected includes both confirmed HIV infection (50/300) and presumed severe HIV disease (2/300).

<sup>3</sup> Includes 6 children who were HIV-exposed but final status pending due to definitive HIV test result pending or were still breast-feeding

<sup>4</sup> Denominator excludes children with edema, per World Health Organization (WHO) guidelines.

<sup>5</sup> WHO severe acute malnutrition criteria for children aged 6-60 months: WFH z-score  $\leq$ -3 SD, MUAC  $\leq$ 115mm, or bilateral pedal edema

<sup>6</sup> Without response to antibiotics

<sup>7</sup> Denominator includes only those patients that were started on anti-tuberculosis therapy AND returned for follow-up.

<sup>8</sup> Resolution of presenting clinical signs/symptoms suggestive of tuberculosis (cough, lethargy/reduced playfulness, fever) and improvement in weight-for-height, edema, or MUAC.

<sup>9</sup> 1 death occurred prior to 6-week follow-up, all others occurred during hospitalization.
